# Supplementary material for: Identifying 4 Novel lncRNAs as Potential Biomarkers for Acute Rejection and Graft Loss of Renal Allograft
Source: Hindawi journal article supplement (doi:10.1155/2020/2415374), 2020-01-01

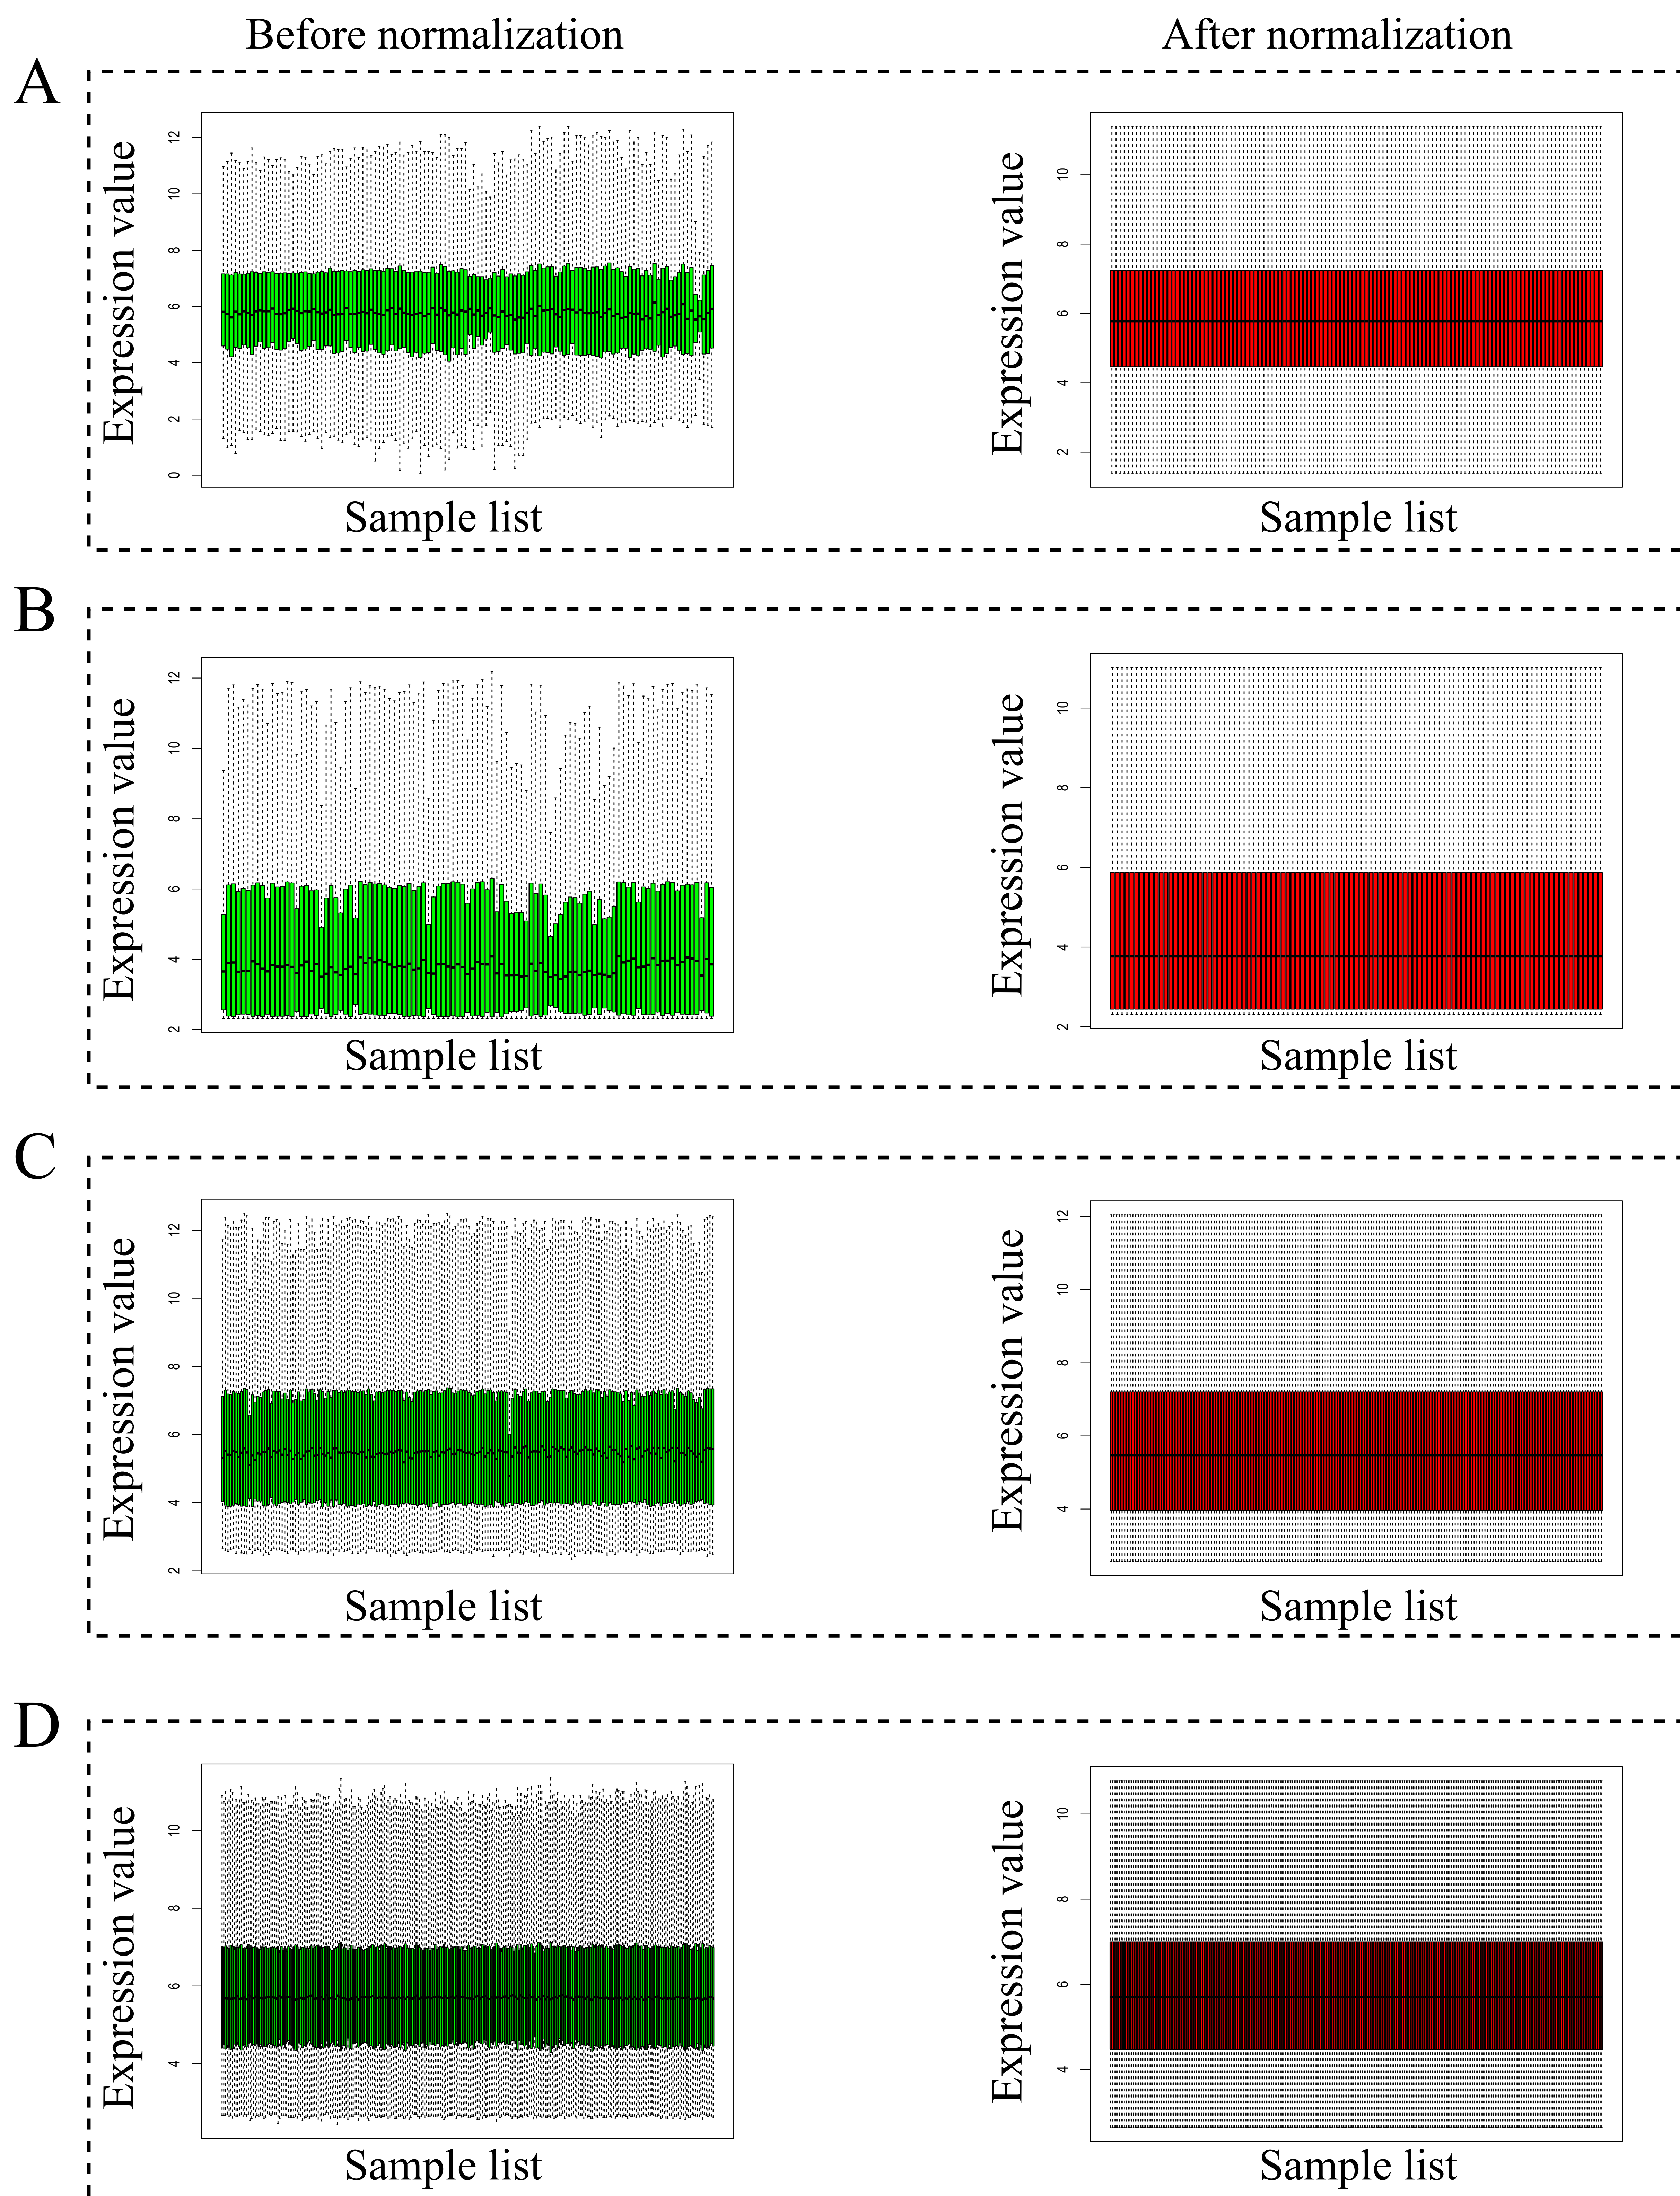

Supplement: f1 [file 2415374.f1.pdf]
